# Supplementary material
Source: PubMed Central journal article supplement (PMC5427277)
Supplement: 10.1074_M116.761122_jbc.M116.761122-1.pdf [file 10.1074_M116.761122_jbc.M116.761122-1.pdf]

**SUPPLEMENTARY FIGURE S1.**

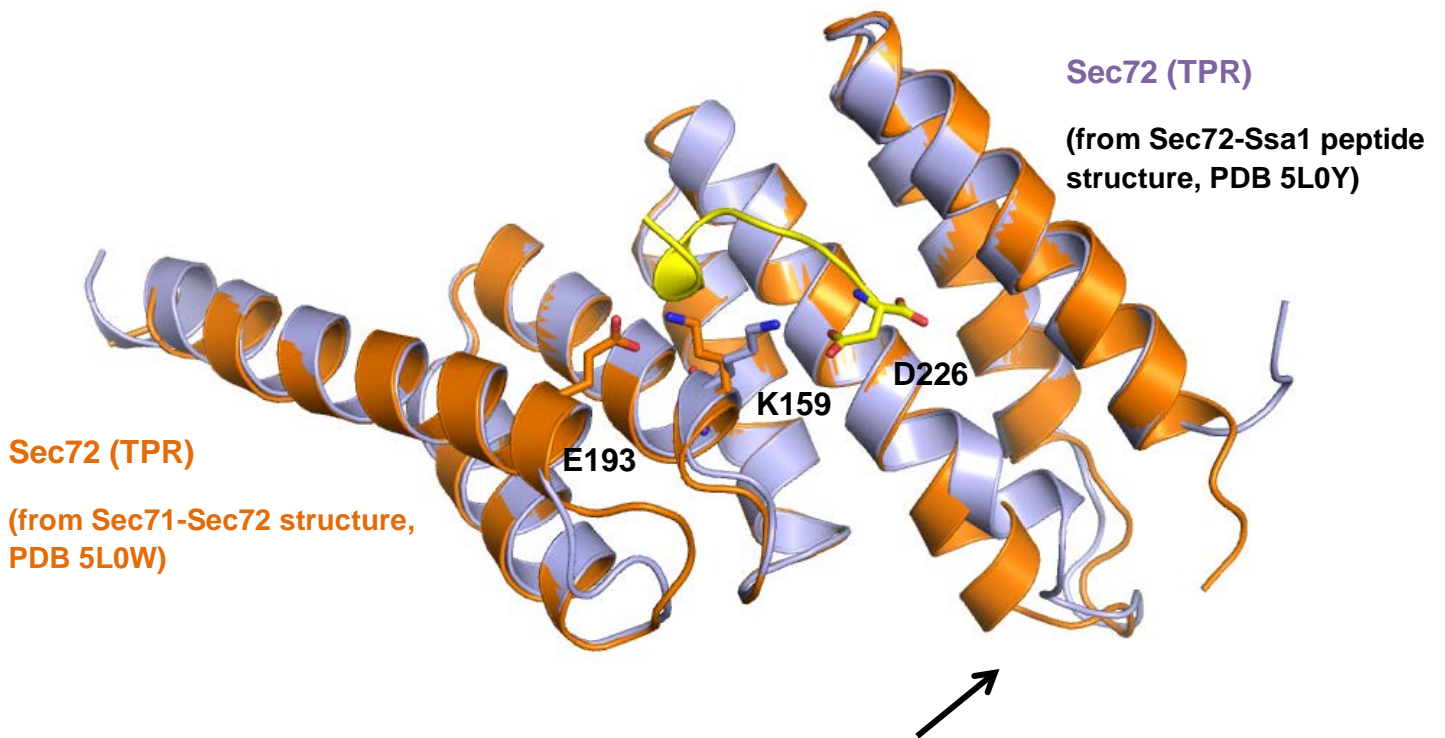

**Supplementary Figure S1 : Structure of the Sec72 TPR domains with and without bound Ssa peptide.** Superposition of the structures of the TPR domains of the Sec71/Sec72 complex (orange) and the fusion to a Ssa peptide (light blue). The arrow points to a difference between the two structures, which is caused by crystal contacts. Lys159 has a different position in the two structures. The linker between the C-terminus of Sec72 and the Ssa peptide is invisible in the density map and thus likely unstructured.

**SUPPLEMENTARY FIGURE S2.**

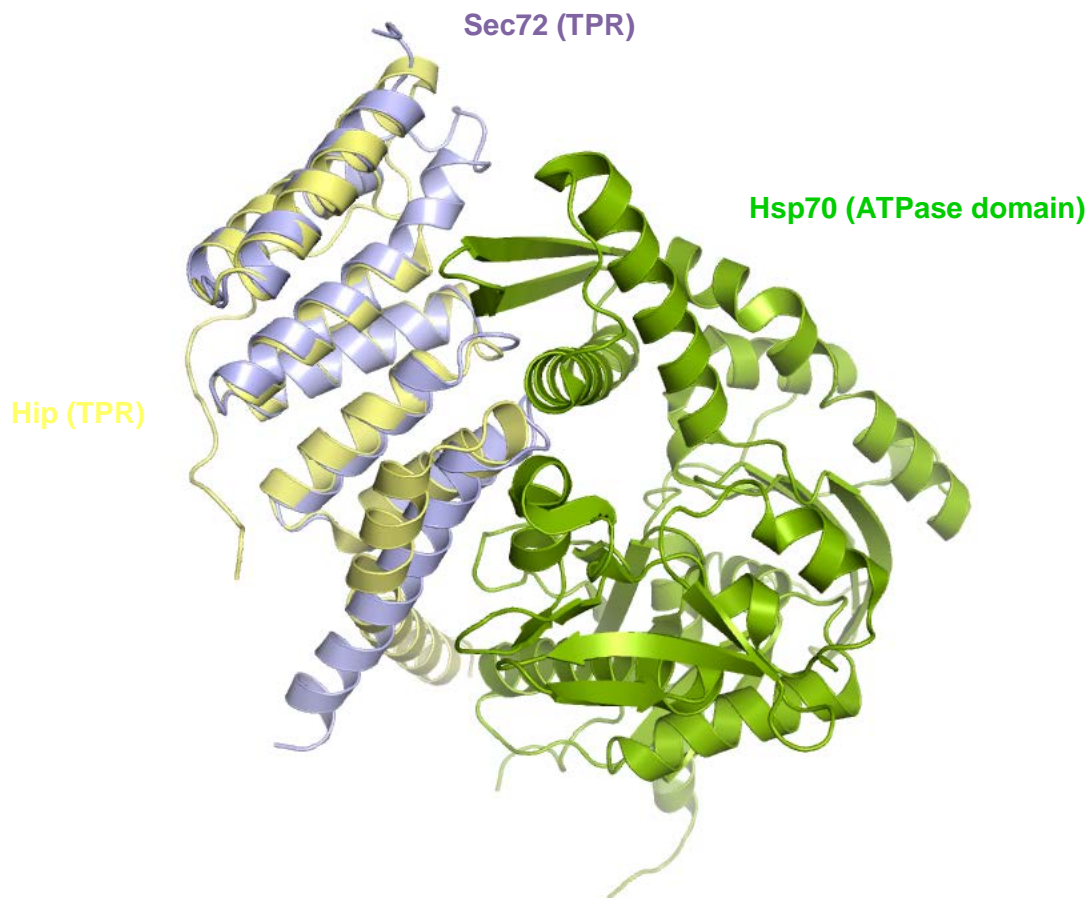

**Supplementary Figure S2: Sec72 TPR domain bound to the ATPase domain of Hsp70 modeled after a Hip-ATPase structure.** The structure of the TPR domain of Sec72 (light blue) was aligned with the TPR domain of Hip (yellow) in a structure of a complex with the Hsp70 ATPase domain (green; PDB 4J8F).

**SUPPLEMENTARY TABLE 1.**

**Table 1. Data collection and refinement statistics**

|                                                     | Sec71/Sec72<br>SeMet      |                         | TPR-peptide                       |
|-----------------------------------------------------|---------------------------|-------------------------|-----------------------------------|
| <b>Data collection</b>                              |                           |                         |                                   |
| Space group                                         | P 6 <sub>5</sub> 2 2      |                         | P 2 <sub>1</sub> 2 <sub>1</sub> 2 |
| Cell dimensions                                     |                           |                         |                                   |
| <i>a</i> , <i>b</i> , <i>c</i> (Å)                  | 108.6, 108.6, 271.2       |                         | 76.5, 118.5, 164.0                |
| $\alpha$ , $\beta$ , $\gamma$ (°)                   | 90.0, 90.0, 120.0         |                         | 90.0, 90.0, 90.0                  |
| Wavelength (Å)                                      | 0.9792                    |                         | 1.033                             |
|                                                     | Crystal 1                 | Crystal 2               |                                   |
| Resolution                                          | 46.74 – 3.02(3.13 – 3.02) | 46.77 – 3.07(3.18–3.07) | 164.05 – 2.87(2.973 – 2.87)       |
| <i>R</i> <sub>meas</sub>                            | 0.145(1.75)               | 0.136(1.72)             | 0.064( 0.595)                     |
| <i>I</i> / $\sigma$ <i>I</i>                        | 17 (1.8)                  | 19 (1.8)                | 16.0 (2.10)                       |
| Completeness (%)                                    | 99.8(99)                  | 99.5(99)                | 99.34 (99.65)                     |
| Redundancy                                          | 9.4(9.1)                  | 9.5(9.6)                | 2.0(2.0)                          |
| <i>CC</i> <sub>1/2</sub>                            | 0.99(0.76)                | 0.99(0.70)              | 0.99(0.66)                        |
| <b>Refinement</b>                                   |                           |                         |                                   |
| Resolution (Å)                                      | 20.1 - 3.04               |                         | 96.08 - 2.87                      |
| No. reflections                                     | 18882                     |                         | 34691                             |
| <i>R</i> <sub>work</sub> / <i>R</i> <sub>free</sub> | 0.223/0.250               |                         | 0.236/0.284                       |
| No. atoms                                           | 2962                      |                         | 9720                              |
| Protein                                             | 2962                      |                         | 9720                              |
| Ligand/ion                                          |                           |                         |                                   |
| Water                                               |                           |                         |                                   |
| <i>B</i> -factors                                   |                           |                         |                                   |
| Protein                                             | 90.00                     |                         | 79.00                             |
| Ligand/ion                                          |                           |                         |                                   |
| Water                                               |                           |                         |                                   |
| R.m.s. deviations                                   |                           |                         |                                   |
| Bond lengths (Å)                                    | 0.005                     |                         | 0.008                             |
| Bond angles (°)                                     | 0.91                      |                         | 1.07                              |

\*Values in parentheses are for highest-resolution shell.
